# Supplementary material for: Effects of NRP1 on angiogenesis and vascular maturity in endothelial cells are dependent on the expression of SEMA4D
Source: PubMed Central journal article supplement — Int J Mol Med. 2020 Aug 3;46(4):1321–34. doi: 10.3892/ijmm.2020.4692 (PMC7447310; doi:10.3892/ijmm.2020.4692), 2020-08-03
Supplement: Supplementary_Data.pdf [file Supplementary_Data.pdf]

Figure S1. *In vitro* assays of NRP1 functions in the HUVEC cell line with overexpression or knockdown. (A) Migration ability of HUVEC cells with NRP1 overexpression or knockdown (x200; Olympus Corporation). (B) *In vitro* tube-forming activity of HUVEC cells with NRP1 overexpression or knockdown. The number of cells or tubes were counted in five randomly selected fields under a light microscope (x40; Olympus Corporation). NC, control group; NRP1, overexpression NRP1 group; siNRP1, knockdown NRP1 group. \*\*P<0.01 vs. NC. NRP1, neuropilin 1; HUVEC, primary human umbilical vein endothelial cells.

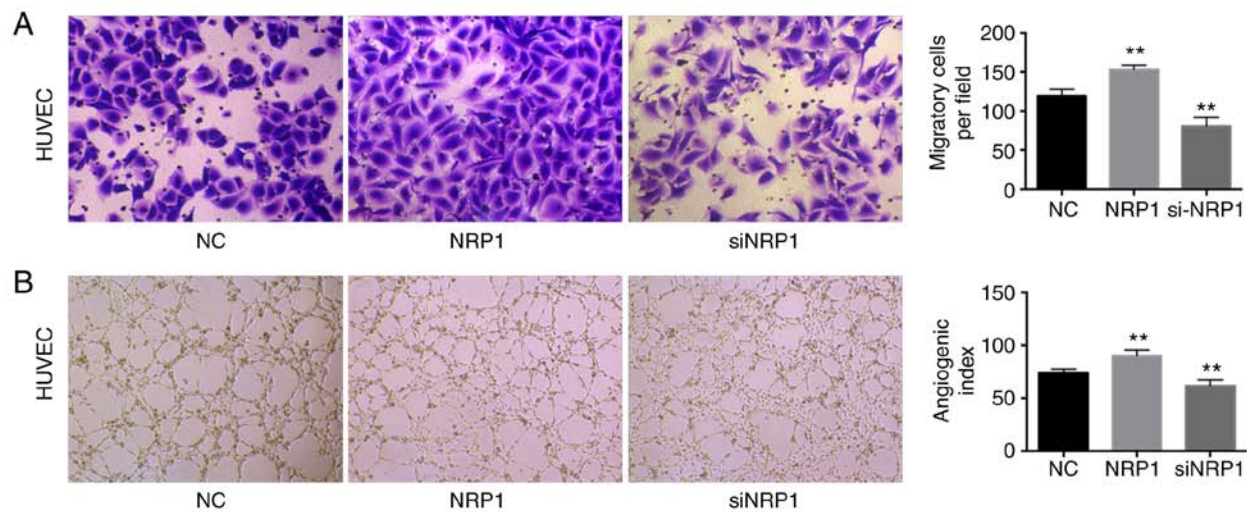

Table SI. KEGG enrichment pathway analysis.

| No. | Pathway                                                           | DEGs with pathway annotation (n=33) (%) | All genes with pathway annotation (n=27474) (%) | P-value | Q-value | Pathway ID |
|-----|-------------------------------------------------------------------|-----------------------------------------|-------------------------------------------------|---------|---------|------------|
| 1   | Thyroid cancer                                                    | 3 (9.09)                                | 206 (0.75)                                      | 0.002   | 0.169   | ko05216    |
| 2   | Antigen processing and presentation                               | 3 (9.09)                                | 287 (1.04)                                      | 0.005   | 0.200   | ko04612    |
| 3   | RNA degradation                                                   | 3 (9.09)                                | 324 (1.18)                                      | 0.007   | 0.200   | ko03018    |
| 4   | IL-17 signaling pathway                                           | 2 (6.06)                                | 346 (1.26)                                      | 0.065   | 0.656   | ko04657    |
| 5   | Bacterial invasion of epithelial cells                            | 2 (6.06)                                | 444 (1.62)                                      | 0.099   | 0.656   | ko05100    |
| 6   | Collecting duct acid secretion                                    | 1 (3.03)                                | 101 (0.37)                                      | 0.115   | 0.656   | ko04966    |
| 7   | HIF-1 signaling pathway                                           | 2 (6.06)                                | 511 (1.86)                                      | 0.125   | 0.656   | ko04066    |
| 8   | Prostate cancer                                                   | 2 (6.06)                                | 521 (1.9)                                       | 0.129   | 0.656   | ko05215    |
| 9   | AMPK signaling pathway                                            | 2 (6.06)                                | 545 (1.98)                                      | 0.139   | 0.656   | ko04152    |
| 10  | Pathways in cancer                                                | 5 (15.15)                               | 2385 (8.68)                                     | 0.154   | 0.656   | ko05200    |
| 11  | Insulin signaling pathway                                         | 2 (6.06)                                | 582 (2.12)                                      | 0.154   | 0.656   | ko04910    |
| 12  | Proteasome                                                        | 1 (3.03)                                | 177 (0.64)                                      | 0.192   | 0.656   | ko03050    |
| 13  | Fructose and mannose metabolism                                   | 1 (3.03)                                | 179 (0.65)                                      | 0.194   | 0.656   | ko00051    |
| 14  | RNA transport                                                     | 2 (6.06)                                | 681 (2.48)                                      | 0.197   | 0.656   | ko03013    |
| 15  | Fluid shear stress and atherosclerosis                            | 2 (6.06)                                | 683 (2.49)                                      | 0.198   | 0.656   | ko05418    |
| 16  | Protein processing in endoplasmic reticulum                       | 2 (6.06)                                | 690 (2.51)                                      | 0.201   | 0.656   | ko04141    |
| 17  | MicroRNAs in cancer                                               | 2 (6.06)                                | 714 (2.6)                                       | 0.211   | 0.656   | ko05206    |
| 18  | N-Glycan biosynthesis                                             | 1 (3.03)                                | 208 (0.76)                                      | 0.222   | 0.656   | ko00510    |
| 19  | Oxytocin signaling pathway                                        | 2 (6.06)                                | 767 (2.79)                                      | 0.235   | 0.656   | ko04921    |
| 20  | Ferroptosis                                                       | 1 (3.03)                                | 224 (0.82)                                      | 0.237   | 0.656   | ko04216    |
| 21  | Amino sugar and nucleotide sugar metabolism                       | 1 (3.03)                                | 225 (0.82)                                      | 0.238   | 0.656   | ko00520    |
| 22  | Axon guidance                                                     | 2 (6.06)                                | 783 (2.85)                                      | 0.242   | 0.656   | ko04360    |
| 23  | Lysine degradation                                                | 1 (3.03)                                | 235 (0.86)                                      | 0.247   | 0.656   | ko00310    |
| 24  | <i>Vibrio cholerae</i> infection                                  | 1 (3.03)                                | 236 (0.86)                                      | 0.248   | 0.656   | ko05110    |
| 25  | Basal cell carcinoma                                              | 1 (3.03)                                | 241 (0.88)                                      | 0.252   | 0.656   | ko05217    |
| 26  | Cocaine addiction                                                 | 1 (3.03)                                | 253 (0.92)                                      | 0.263   | 0.656   | ko05030    |
| 27  | VEGF signaling pathway                                            | 1 (3.03)                                | 271 (0.99)                                      | 0.280   | 0.656   | ko04370    |
| 28  | RIG-I-like receptor signaling pathway                             | 1 (3.03)                                | 285 (1.04)                                      | 0.291   | 0.656   | ko04622    |
| 29  | Epithelial cell signaling in <i>Helicobacter pylori</i> infection | 1 (3.03)                                | 313 (1.14)                                      | 0.315   | 0.656   | ko05120    |
| 30  | B cell receptor signaling pathway                                 | 1 (3.03)                                | 324 (1.18)                                      | 0.324   | 0.656   | ko04662    |
| 31  | Rheumatoid arthritis                                              | 1 (3.03)                                | 325 (1.18)                                      | 0.325   | 0.656   | ko05323    |
| 32  | Acute myeloid leukemia                                            | 1 (3.03)                                | 332 (1.21)                                      | 0.331   | 0.656   | ko05221    |
| 33  | Protein digestion and absorption                                  | 1 (3.03)                                | 336 (1.22)                                      | 0.334   | 0.656   | ko04974    |
| 34  | Synaptic vesicle cycle                                            | 1 (3.03)                                | 337 (1.23)                                      | 0.335   | 0.656   | ko04721    |
| 35  | Glycolysis/Gluconeogenesis                                        | 1 (3.03)                                | 338 (1.23)                                      | 0.336   | 0.656   | ko00010    |
| 36  | Adipocytokine signaling pathway                                   | 1 (3.03)                                | 339 (1.23)                                      | 0.336   | 0.656   | ko04920    |
| 37  | Inositol phosphate metabolism                                     | 1 (3.03)                                | 342 (1.24)                                      | 0.339   | 0.656   | ko00562    |
| 38  | Cardiac muscle contraction                                        | 1 (3.03)                                | 348 (1.27)                                      | 0.344   | 0.656   | ko04260    |
| 39  | Endometrial cancer                                                | 1 (3.03)                                | 351 (1.28)                                      | 0.346   | 0.656   | ko05213    |
| 40  | Mitophagy-animal                                                  | 1 (3.03)                                | 367 (1.34)                                      | 0.359   | 0.656   | ko04137    |
| 41  | Fc gamma R-mediated phagocytosis                                  | 1 (3.03)                                | 367 (1.34)                                      | 0.359   | 0.656   | ko04666    |
| 42  | Glycerophospholipid metabolism                                    | 1 (3.03)                                | 376 (1.37)                                      | 0.366   | 0.656   | ko00564    |
| 43  | Gap junction                                                      | 1 (3.03)                                | 390 (1.42)                                      | 0.376   | 0.656   | ko04540    |
| 44  | mRNA surveillance pathway                                         | 1 (3.03)                                | 397 (1.45)                                      | 0.382   | 0.656   | ko03015    |
| 45  | HCM                                                               | 1 (3.03)                                | 397 (1.45)                                      | 0.382   | 0.656   | ko05410    |
| 46  | Chronic myeloid leukemia                                          | 1 (3.03)                                | 404 (1.47)                                      | 0.387   | 0.656   | ko05220    |
| 47  | ARVC                                                              | 1 (3.03)                                | 409 (1.49)                                      | 0.391   | 0.656   | ko05412    |
| 48  | Longevity regulating pathway-mammal                               | 1 (3.03)                                | 423 (1.54)                                      | 0.401   | 0.656   | ko04211    |
| 49  | Melanogenesis                                                     | 1 (3.03)                                | 443 (1.61)                                      | 0.415   | 0.656   | ko04916    |
| 50  | Oxidative phosphorylation                                         | 1 (3.03)                                | 444 (1.62)                                      | 0.416   | 0.656   | ko00190    |
| 51  | ErbB signaling pathway                                            | 1 (3.03)                                | 446 (1.62)                                      | 0.417   | 0.656   | ko04012    |
| 52  | DCM                                                               | 1 (3.03)                                | 448 (1.63%)                                     | 0.419   | 0.656   | ko05414    |

Table SI. Continued.

| No. | Pathway                                  | DEGs with pathway annotation (n=33) (%) | All genes with pathway annotation (n=27474) (%) | P-value | Q-value | Pathway ID |
|-----|------------------------------------------|-----------------------------------------|-------------------------------------------------|---------|---------|------------|
| 53  | GABAergic synapse                        | 1 (3.03)                                | 451 (1.64)                                      | 0.421   | 0.656   | ko04727    |
| 54  | GnRH signaling pathway                   | 1 (3.03)                                | 469 (1.71)                                      | 0.434   | 0.656   | ko04912    |
| 55  | Adherens junction                        | 1 (3.03)                                | 471 (1.71)                                      | 0.435   | 0.656   | ko04520    |
| 56  | Progesterone-mediated oocyte maturation  | 1 (3.03)                                | 474 (1.73)                                      | 0.437   | 0.656   | ko04914    |
| 57  | Phosphatidylinositol signaling system    | 1 (3.03)                                | 477 (1.74)                                      | 0.439   | 0.656   | ko04070    |
| 58  | Th17 cell differentiation                | 1 (3.03)                                | 478 (1.74)                                      | 0.440   | 0.656   | ko04659    |
| 59  | Colorectal cancer                        | 1 (3.03)                                | 481 (1.75)                                      | 0.442   | 0.656   | ko05210    |
| 60  | TNF signaling pathway                    | 1 (3.03)                                | 489 (1.78)                                      | 0.447   | 0.656   | ko04668    |
| 61  | Aldosterone synthesis and secretion      | 1 (3.03)                                | 525 (1.91)                                      | 0.471   | 0.661   | ko04925    |
| 62  | Glutamatergic synapse                    | 1 (3.03)                                | 549 (2)                                         | 0.486   | 0.661   | ko04724    |
| 63  | Ribosome                                 | 1 (3.03)                                | 564 (2.05)                                      | 0.496   | 0.661   | ko03010    |
| 64  | Breast cancer                            | 1 (3.03)                                | 575 (2.09)                                      | 0.503   | 0.661   | ko05224    |
| 65  | Estrogen signaling pathway               | 1 (3.03)                                | 584 (2.13)                                      | 0.508   | 0.661   | ko04915    |
| 66  | Necroptosis                              | 1 (3.03)                                | 585 (2.13)                                      | 0.509   | 0.661   | ko04217    |
| 67  | Alcoholism                               | 1 (3.03)                                | 596 (2.17)                                      | 0.515   | 0.661   | ko05034    |
| 68  | Regulation of autophagy                  | 1 (3.03)                                | 618 (2.25)                                      | 0.528   | 0.661   | ko04140    |
| 69  | Phagosome                                | 1 (3.03)                                | 629 (2.29)                                      | 0.535   | 0.661   | ko04145    |
| 70  | Neurotrophin signaling pathway           | 1 (3.03)                                | 639 (2.33)                                      | 0.540   | 0.661   | ko04722    |
| 71  | MAPK signaling pathway                   | 2 (6.06)                                | 1499 (5.46)                                     | 0.544   | 0.661   | ko04010    |
| 72  | Ubiquitin-mediated proteolysis           | 1 (3.03)                                | 650 (2.37)                                      | 0.546   | 0.661   | ko04120    |
| 73  | Hippo signaling pathway                  | 1 (3.03)                                | 653 (2.38)                                      | 0.548   | 0.661   | ko04390    |
| 74  | Apoptosis                                | 1 (3.03)                                | 687 (2.5)                                       | 0.567   | 0.662   | ko04210    |
| 75  | Wnt signaling pathway                    | 1 (3.03)                                | 700 (2.55)                                      | 0.574   | 0.662   | ko04310    |
| 76  | Purine metabolism                        | 1 (3.03)                                | 711 (2.59)                                      | 0.579   | 0.662   | ko00230    |
| 77  | NOD-like receptor signaling pathway      | 1 (3.03)                                | 721 (2.62)                                      | 0.584   | 0.662   | ko04621    |
| 78  | Hepatitis B                              | 1 (3.03)                                | 726 (2.64)                                      | 0.587   | 0.662   | ko05161    |
| 79  | Tuberculosis                             | 1 (3.03)                                | 778 (2.83)                                      | 0.613   | 0.675   | ko05152    |
| 80  | Adrenergic signaling in cardiomyocytes   | 1 (3.03)                                | 780 (2.84)                                      | 0.614   | 0.675   | ko04261    |
| 81  | Regulation of actin cytoskeleton         | 1 (3.03)                                | 899 (3.27)                                      | 0.667   | 0.724   | ko04810    |
| 82  | Transcriptional misregulation in cancers | 1 (3.03)                                | 942 (3.43)                                      | 0.684   | 0.728   | ko05202    |
| 83  | Proteoglycans in cancer                  | 1 (3.03)                                | 948 (3.45)                                      | 0.686   | 0.728   | ko05205    |
| 84  | Rap1 signaling pathway                   | 1 (3.03)                                | 1003 (3.65)                                     | 0.707   | 0.741   | ko04015    |
| 85  | Endocytosis                              | 1 (3.03)                                | 1054 (3.84)                                     | 0.725   | 0.751   | ko04144    |
| 86  | HTLV-I infection                         | 1 (3.03)                                | 1172 (4.27)                                     | 0.763   | 0.781   | ko05166    |
| 87  | Human papillomavirus infection           | 1 (3.03)                                | 1378 (5.02)                                     | 0.817   | 0.827   | ko05165    |
| 88  | PI3K-Akt signaling pathway               | 1 (3.03)                                | 1444 (5.26)                                     | 0.832   | 0.832   | ko04151    |

KEGG, Kyoto Encyclopedia of Genes and Genomes; DEGs, differentially expressed genes; HCM, hypertrophic cardiomyopathy; ARVC, arrhythmogenic right ventricular cardiomyopathy; DCM, dilated cardiomyopathy.
